# Supplementary material
Source: Springer Nature journal article supplement (https://www.springermedizin.de/resource/supplementary/12936_2010_1654_MOESM1_ESM.pdf/9542290)
Supplement: MOESM1 [file 9542290]

## 559 initiated ART

69% female

Median age 38 (33-44) yrs

51% had baseline CD4 count <100 cells/  $\mu$ l

74% initiated D4T+3TC+NVP & 26% initiated ZDV+3TC+EFV

252 has sustained viral suppression up to 4 years

25 died (15-HIV/AIDS-related deaths, 6 –other medical illnesses, 4 cause of death cannot be determined)

7 transferred out to other ART centers

5 lost to follow up

4 withdrew consent to participate in the research cohort

0 patients with a reported opportunistic infection (s) 6 months prior to the study

211 patients were eligible for current study

128 patients systematically selected  
Complete blood count (CBC) and rapid diagnostic test (RDT) for malaria were performed
